# Supplementary material
Source: Research Square preprint supplement (doi:10.21203/rs.3.rs-9117218/v1)
Supplement: Supplementary file 1 [file e2b8c074a7eb8b34aa159d70.docx]

**Supplements**

|  | **PCS** | | **MCS** | |
| --- | --- | --- | --- | --- |
| **Variable** | **Estimate (95 % CI)** | **p-value** | **Estimate (95 % CI)** | **p-value** |
| Female sex | -1.749 (-3.322 – -0.177) | **0.029** | -0.87 (-2.507 – 0.767) | 0.297 |
| Age | -0.182 (-0.255 – -0.109) | **< 0.001** | 0.134 (0.058 – 0.211) | **0.001** |
| Age 65-74 y. | -1.259 (-2.861 – 0.343) | 0.123 | 3.538 (1.867 – 5.209) | **< 0.001** |
| Age ≥ 75 y. | -4.963 (-6.821 – -3.105) | **< 0.001** | 3.657 (1.719 – 5.595) | **< 0.001** |
| Preop. Hb | 1.058 (0.652 – 1.464) | **< 0.001** | -0.077 (-0.505 – 0.352) | 0.725 |
| Mild anemia | -3.071 (-5.272 – -0.871) | **0.006** | 0.622 (-1.691 – 2.935) | 0.598 |
| Mod./sev. an. | -6.831 (-10.448 – -3.214) | **< 0.001** | 0.993 (-2.809 – 4.796) | 0.608 |
| LDL 55-69 mg/dl | 0.167 (-2.064 – 2.398) | 0.883 | -0.391 (-2.721 – 1.94) | 0.742 |
| LDL ≥ 70 mg/dl | -0.919 (-2.657 – 0.819) | 0.300 | 0.919 (-0.897 – 2.734) | 0.321 |
| Lp(a) ≥ 50 mg/dl | 0.729 (-0.845 – 2.303) | 0.364 | 0.732 (-0.909 – 2.373) | 0.381 |
| Underweight | -1.442 (-7.595 – 4.71) | 0.645 | -1.971 (-8.461 – 4.519) | 0.551 |
| Overweight | -2.217 (-3.929 – -0.506) | **0.011** | 0.384 (-1.421 – 2.189) | 0.676 |
| Obese | -5.063 (-6.905 – -3.221) | **< 0.001** | -0.481 (-2.424 – 1.462) | 0.627 |
| Hypertension | -3.27 (-5.094 – -1.445) | **< 0.001** | -0.305 (-2.215 – 1.605) | 0.754 |
| Diabetes | -2.904 (-4.63 – -1.178) | **0.001** | -0.283 (-2.088 – 1.522) | 0.759 |
| PAD | -4.594 (-7.655 – -1.533) | **0.003** | 0.763 (-2.434 – 3.961) | 0.639 |
| Active smoking | -1.833 (-3.938 – 0.272) | 0.088 | -1.975 (-4.166 – 0.215) | 0.077 |
| Former smoking | -2.183 (-3.782 – -0.585) | **0.007** | -2.062 (-3.725 – -0.399) | **0.015** |
| NYHA II | -0.382 (-2.861 – 2.098) | 0.763 | 1.991 (-0.628 – 4.611) | 0.136 |
| NYHA III | -3.965 (-6.322 – -1.608) | **0.001** | -0.774 (-3.264 – 1.715) | 0.542 |
| NYHA IV | -10.885 (-15.626 – -6.145) | **< 0.001** | -3.706 (-8.713 – 1.302) | 0.147 |
| LVEF | 0.149 (0.075 – 0.223) | **< 0.001** | 0.018 (-0.06 – 0.096) | 0.652 |
| LVEF 41 - 49 % | -2.17 (-4.864 – 0.524) | 0.114 | 0.588 (-2.229 – 3.405) | 0.682 |
| LVEF ≤ 40 % | -3.832 (-6.256 – -1.408) | **0.002** | -0.688 (-3.222 – 1.847) | 0.595 |
| Dur. anesth. | -0.017 (-0.027 – -0.007) | **0.001** | 0 (-0.01 – 0.011) | 0.959 |
| Dur. interv. | -0.013 (-0.024 – -0.001) | **0.027** | 0.002 (-0.009 – 0.014) | 0.692 |
| Isolated Off-Pump CABG | -2.006 (-3.75 – -0.261) | **0.024** | -0.894 (-2.738 – 0.951) | 0.342 |
| CABG combinations | -1.635 (-3.874 – 0.604) | 0.152 | 0.31 (-2.04 – 2.661) | 0.796 |
| Aortic procedures | 0.901 (-1.234 – 3.037) | 0.408 | 0.048 (-2.194 – 2.291) | 0.966 |
| Dur. ICU-stay | -0.423 (-0.577 – -0.269) | **< 0.001** | -0.084 (-0.247 – 0.079) | 0.313 |
| Dur. hosp.-stay | -0.203 (-0.278 – -0.128) | **< 0.001** | -0.047 (-0.125 – 0.032) | 0.248 |
| POI | -7.782 (-11.516 – -4.048) | **< 0.001** | -4.231 (-8.138 – -0.323) | **0.034** |
| Frailty-program | -2.226 (-3.9 – -0.552) | **0.009** | 1.626 (-0.116 – 3.368) | 0.067 |
| Pre-Frail | -5.576 (-8.808 – -2.345) | **0.001** | -0.758 (-4.092 – 2.577) | 0.655 |
| Physical frailty | -9.586 (-13.957 – -5.216) | **< 0.001** | -2.245 (-6.755 – 2.265) | 0.327 |
| Mental frailty | -5.182 (-11.017 – 0.652) | 0.081 | -4.723 (-10.499 – 1.052) | 0.108 |
| POD | 1.174 (-5.145 – 7.494) | 0.714 | 0.349 (-5.843 – 6.54) | 0.912 |
|  |  |  |  |  |

Supplementary Table 1: Univariate analyses (CABG: coronary artery bypass graft; CI: confidence interval; Dur.: duration; Hb: hemoglobin; LDL: low density lipoprotein; Lp(a): lipoprotein(a); LVEF: left ventricular ejection fraction; MCS: mental component summary; Mod./sev. an.: moderate/severe anemia; NYHA: New York Heart Association; PAD: peripheral arterial disease; PCS: physical component summary; POI: postoperative infection; POD: postoperative delirium; Preop.: preoperative; y.: years)

|  | **PCS** | | **MCS** | |
| --- | --- | --- | --- | --- |
| **Variable** | **Estimate (95 % CI)** | **p-value** | **Estimate (95 % CI)** | **p-value** |
| Female sex | -2.564 (-4.282 – -0.846) | **0.004** | -1.469 (-4.282 – -0.846) | 0.133 |
| Age 65-74 y. | 0.103 (-1.705 – 1.912) | 0.911 | 4.53 (-1.705 – 1.912) | **< 0.001** |
| Age ≥ 75 y. | -3.997 (-6.17 – -1.825) | **< 0.001** | 4.334 (-6.17 – -1.825) | **< 0.001** |
| Mild anemia | -3.432 (-5.767 – -1.096) | **0.004** | -0.767 (-5.767 – -1.096) | 0.563 |
| Mod./sev. an. | -2.586 (-7.047 – 1.875) | 0.256 | 0.349 (-7.047 – 1.875) | 0.891 |
| LDL 55-69 mg/dl | 1.499 (-0.781 – 3.778) | 0.197 | 0.541 (-0.781 – 3.778) | 0.676 |
| LDL ≥ 70 mg/dl | 0.348 (-1.418 – 2.115) | 0.699 | 0.908 (-1.418 – 2.115) | 0.366 |
| Lp(a) ≥ 50 mg/dl | 0.319 (-1.167 – 1.805) | 0.673 | 0.499 (-1.167 – 1.805) | 0.554 |
| Underweight | 0.429 (-6.122 – 6.979) | 0.898 | -3.413 (-6.122 – 6.979) | 0.359 |
| Overweight | -1.927 (-3.745 – -0.11) | **0.038** | 0.791 (-3.745 – -0.11) | 0.444 |
| Obese | -4.566 (-6.534 – -2.597) | **< 0.001** | 0.523 (-6.534 – -2.597) | 0.640 |
| Hypertension | -1.564 (-3.533 – 0.405) | 0.119 | -0.499 (-3.533 – 0.405) | 0.656 |
| Diabetes | -1.226 (-3.124 – 0.673) | 0.205 | 0.183 (-3.124 – 0.673) | 0.865 |
| PAD | -3.366 (-6.573 – -0.16) | **0.040** | 1.646 (-6.573 – -0.16) | 0.367 |
| Active smoking | -2.727 (-4.998 – -0.456) | **0.019** | -1.604 (-4.998 – -0.456) | 0.214 |
| Former smoking | -1.938 (-3.608 – -0.269) | **0.023** | -2.182 (-3.608 – -0.269) | **0.022** |
| NYHA II | -0.33 (-2.941 – 2.281) | 0.804 | 0.121 (-2.941 – 2.281) | 0.935 |
| NYHA III | -2.964 (-5.502 – -0.426) | **0.022** | -2.129 (-5.502 – -0.426) | 0.140 |
| NYHA IV | -6.067 (-11.549 – -0.585) | **0.030** | -4.822 (-11.549 – -0.585) | 0.122 |
| LVEF 41 - 49 % | -0.313 (-3.034 – 2.409) | 0.821 | 1.025 (-3.034 – 2.409) | 0.508 |
| LVEF ≤ 40 % | -0.839 (-3.498 – 1.821) | 0.536 | 1.269 (-3.498 – 1.821) | 0.401 |
| Isolated Off-Pump CABG | -1.048 (-3.04 – 0.943) | 0.302 | -2.505 (-4.743 – -0.267) | **0.028** |
| CABG combinations | -0.571 (-2.973 – 1.83) | 0.641 | -1.298 (-2.973 – 1.83) | 0.342 |
| Aortic procedures | 1.614 (-0.595 – 3.823) | 0.152 | -0.148 (-0.595 – 3.823) | 0.906 |
| POI | -3.683 (-7.864 – 0.498) | 0.084 | -3.304 (-7.864 – 0.498) | 0.165 |
| Frailty-program | -0.621 (-2.578 – 1.336) | 0.534 | -0.059 (-2.578 – 1.336) | 0.958 |
|  | R2 / R2 adjusted 0.199 / 0.165 | | R2 / R2 adjusted 0.078 / 0.039 | |
|  |  |  |  |  |

Supplementary Table 2: Multivariate analysis of the cohort (CABG: coronary artery bypass graft; CI: confidence interval; LDL: low density lipoprotein; Lp(a): lipoprotein(a); LVEF: left ventricular ejection fraction; MCS: mental component summary; Mod./sev. an.: moderate/severe anemia; NYHA: New York Heart Association; PAD: peripheral arterial disease; PCS: physical component summary; POI: postoperative infection; y.: years)

|  | **PCS** | | **MCS** | |
| --- | --- | --- | --- | --- |
| **Variable** | **Estimate (95 % CI)** | **p-value** | **Estimate (95 % CI)** | **p-value** |
| Female sex | -1.594 (-5.238 – 2.05) | 0.388 | -1.456 (-5.651 – 2.738) | 0.493 |
| Age ≥ 75 y. | -2.503 (-5.934 – 0.928) | 0.151 | 1.394 (-2.556 – 5.343) | 0.486 |
| Mild anemia | -5.457 (-10.32 – -0.594) | 0.028 | -2.222 (-7.82 – 3.377) | 0.434 |
| Mod./sev. an. | -2.953 (-10.36 – 4.453) | 0.432 | 0.74 (-7.786 – 9.266) | 0.864 |
| LDL 55-69 mg/dl | 4.052 (-1.547 – 9.65) | 0.155 | 1.433 (-5.012 – 7.877) | 0.661 |
| LDL ≥ 70 mg/dl | 1.309 (-2.354 – 4.971) | 0.481 | 0.244 (-3.972 – 4.46) | 0.909 |
| Lp(a) ≥ 50 mg/dl | 0.294 (-2.994 – 3.582) | 0.860 | -1.445 (-5.23 – 2.34) | 0.451 |
| Underweight | -0.566 (-9.268 – 8.136) | 0.898 | -1.073 (-11.091 – 8.945) | 0.833 |
| Overweight | 0.745 (-3.563 – 5.053) | 0.733 | 1.198 (-3.761 – 6.157) | 0.634 |
| Obese | -5.475 (-10.429 – -0.521) | **0.031** | -0.024 (-5.727 – 5.679) | 0.993 |
| Hypertension | 1.624 (-3.676 – 6.925) | 0.545 | -0.442 (-6.544 – 5.66) | 0.886 |
| Diabetes | 1.515 (-2.954 – 5.984) | 0.504 | 0.455 (-4.69 – 5.6) | 0.861 |
| PAD | -3.498 (-9.258 – 2.262) | 0.232 | -2.27 (-8.9 – 4.361) | 0.500 |
| Active smoking | -0.988 (-7.279 – 5.303) | 0.757 | -0.289 (-7.531 – 6.953) | 0.937 |
| Former smoking | -2.76 (-6.439 – 0.92) | 0.140 | -2.788 (-7.024 – 1.447) | 0.195 |
| NYHA II | 5.791 (-1.576 – 13.158) | 0.122 | 4.089 (-4.392 – 12.57) | 0.342 |
| NYHA III | 4.451 (-2.533 – 11.434) | 0.210 | -0.012 (-8.051 – 8.027) | 0.998 |
| NYHA IV | 1.611 (-10.148 – 13.371) | 0.787 | -1.672 (-15.209 – 11.865) | 0.807 |
| LVEF 41 - 49 % | -0.845 (-6.063 – 4.373) | 0.749 | -0.366 (-6.373 – 5.64) | 0.904 |
| LVEF ≤ 40 % | -1.546 (-6.95 – 3.857) | 0.572 | 5.457 (-0.764 – 11.677) | 0.085 |
| Isolated Off-Pump CABG | -3.189 (-8.196 - 1.818) | 0.210 | 2.810 (-2.852 – 8.472) | 0.328 |
| CABG combinations | 1.248 (-4.211 – 6.706) | 0.652 | 3.037 (-3.247 – 9.321) | 0.341 |
| Aortic procedures | -1.094 (-6.058 – 3.871) | 0.664 | 0.331 (-5.384 – 6.046) | 0.909 |
| POI | -7.226 (-15.595 – 1.143) | 0.090 | -1.447 (-11.081 – 8.188) | 0.767 |
| Pre-Frail | -6.318 (-9.927 – -2.709) | **0.001** | -1.207 (-5.362 – 2.948) | 0.567 |
| Physical frailty | -9.903 (-17.717 – -2.089) | **0.013** | -3.425 (-12.421 – 5.571) | 0.453 |
| Mental frailty | 0.894 (-6.895 – 8.683) | 0.821 | -6.217 (-15.184 – 2.749) | 0.173 |
| POD | -0.949 (-8.887 – 6.99) | 0.813 | 3.841 (-5.298 – 12.98) | 0.407 |
|  | R2 / R2 adjusted 0.332 / 0.184 | | R2 / R2 adjusted 0.129 / -0.064 | |
|  |  |  |  |  |

Supplementary Table 3: Multivariate analysis of the subgroup (CABG: coronary artery bypass graft; CI: confidence interval; LDL: low density lipoprotein; Lp(a): lipoprotein(a); LVEF: left ventricular ejection fraction; MCS: mental component summary; Mod./sev. an.: moderate/severe anemia; NYHA: New York Heart Association; PAD: peripheral arterial disease; PCS: physical component summary; POI: postoperative infection; POD: postoperative delirium; y.: years)
